# Supplementary material
Source: Springer Nature journal article supplement (https://www.springermedizin.de/resource/supplementary/12913_2013_3033_MOESM7_ESM.pdf/9533354)

Percentage of  
respondent  
hospitals

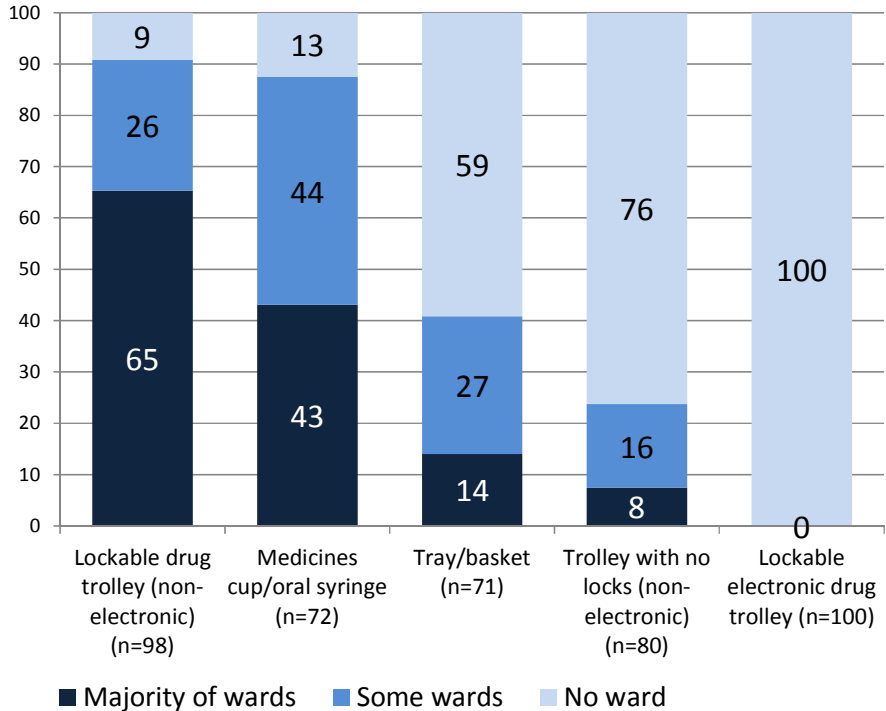

Supplement: MOESM7 [file 9533354]
